# Supplementary material
Source: ML conference proceedings conference paper supplement (https://openaccess.thecvf.com/content/WACV2024/html/Lu_SLoSH_Set_Locality_WACV_2024_paper.html)
Supplement: Supplementary file 1 [file Lu_SLoSH_Set_Locality_WACV_2024_supplemental.pdf]

# 1. Supplementary Materials

## 1.1. Proofs

Here we include the proof for the C1 and C2 conditions covered in Section 3. Recall that  $\mu_i$  represents a probability measure,  $\mu_i^\theta$  represents  $g_{\theta\#}\mu_i$ , where  $g_\theta : \mathbb{R}^d \rightarrow \mathbb{R}$  with some regularity constraints, and that we define the cumulative distribution transform (CDT) of  $\mu_i^\theta$  as

$$\phi_\theta(\mu_i) := (T_i^\theta - id),$$

where  $T_i^\theta$  is the Monge map/coupling, and  $id$  denotes the identity function. For a fixed  $\theta$ , here we prove that  $\phi^\theta(\mu_i)$  satisfies the following conditions:

**C1.** The weighted  $\ell_2$ -norm of the embedded slice,  $\phi_\theta(\mu_i)$ , satisfies:

$$\begin{aligned} \|\phi_\theta(\mu_i)\|_{\mu_0^\theta, 2} &= \left( \int_{\mathbb{R}} \|\phi_\theta(\mu_i(t))\|_2^2 d\mu_0^\theta(t) \right)^{\frac{1}{2}} \\ &= \mathcal{W}_2(\mu_i^\theta, \mu_0^\theta), \end{aligned}$$

*Proof.* We start by writing the squared distance:

$$\begin{aligned} \|\phi_\theta(\mu_i)\|_{\mu_0^\theta, 2}^2 &= \int_{\mathbb{R}} \|\phi_\theta(\mu_i(t))\|_2^2 d\mu_0^\theta(t) \\ &= \int_{\mathbb{R}} \|T_i^\theta(t) - t\|_2^2 d\mu_0^\theta(t) \\ &= \int_{\mathbb{R}} \|(F_{\mu_i^\theta}^{-1} \circ F_{\mu_0^\theta})(t) - t\|_2^2 d\mu_0^\theta(t) \\ &= \int_0^1 \|F_{\mu_i^\theta}^{-1}(\tau) - F_{\mu_0^\theta}^{-1}(\tau)\|_2^2 d\tau \\ &= \mathcal{W}_2^2(\mu_i^\theta, \mu_0^\theta) \end{aligned}$$

where we used the definition of the one-dimensional Monge map,  $T_i^\theta = F_{\mu_i^\theta}^{-1} \circ F_{\mu_0^\theta}$ , and the change of variable  $\tau = F_{\mu_0^\theta}(t)$ . The corollary,  $\|\phi_\theta(\mu_0)\|_{\mu_0^\theta, 2} = 0$ , is trivial as  $\mathcal{W}_2^2(\mu_0^\theta, \mu_0^\theta) = 0$ .  $\square$

**C2.** The weighted  $\ell_2$  distance satisfies:

$$\|\phi_\theta(\mu_i) - \phi_\theta(\mu_j)\|_{\mu_0^\theta, 2} = \mathcal{W}_2(\mu_i^\theta, \mu_j^\theta). \quad (1)$$

*Proof.* Similar to the previous proof:

$$\begin{aligned} \|\phi_\theta(\mu_i) - \phi_\theta(\mu_j)\|_{\mu_0^\theta, 2}^2 &= \int_{\mathbb{R}} \|\phi_\theta(\mu_i(t)) - \phi_\theta(\mu_j(t))\|_2^2 d\mu_0^\theta(t) \\ &= \int_{\mathbb{R}} \|T_i^\theta(t) - T_j^\theta(t)\|_2^2 d\mu_0^\theta(t) \\ &= \int_{\mathbb{R}} \|(F_{\mu_i^\theta}^{-1} \circ F_{\mu_0^\theta})(t) - (F_{\mu_j^\theta}^{-1} \circ F_{\mu_0^\theta})(t)\|_2^2 d\mu_0^\theta(t) \\ &= \int_0^1 \|F_{\mu_i^\theta}^{-1}(\tau) - F_{\mu_j^\theta}^{-1}(\tau)\|_2^2 d\tau = \mathcal{W}_2^2(\mu_i^\theta, \mu_j^\theta) \end{aligned}$$

where again we used the definition of the one-dimensional Monge map,  $T_i^\theta = F_{\mu_i^\theta}^{-1} \circ F_{\mu_0^\theta}$ , and the change of variable  $\tau = F_{\mu_0^\theta}(t)$ .  $\square$

As a corollary of C1 and C2 we have:

$$\begin{aligned} S\mathcal{W}_2^2(\mu_i, \mu_j) &= \int_{\mathbb{S}^{d-1}} \mathcal{W}_2^2(\mu_i^\theta, \mu_j^\theta) d\sigma(\theta) = \\ &= \int_{\mathbb{S}^{d-1}} \|\phi_\theta(\mu_i) - \phi_\theta(\mu_j)\|_{\mu_0^\theta, 2}^2 d\sigma(\theta) \end{aligned}$$

## 1.2. Full Experimental Results

In Table 1 and 2, we provide the full experimental results with standard deviation. GeM and Cov do not have a std as their outputs are deterministic.

Table 1. Retrieval results of baselines and our approach on set retrieval on the three data sets (precision@k).

|                   | Point MNIST 2D   |                  |                  | ModelNet 40      |                  |                  | Oxford 5k        |                  |                  |
|-------------------|------------------|------------------|------------------|------------------|------------------|------------------|------------------|------------------|------------------|
|                   | Precision@k      |                  |                  | Precision@k      |                  |                  | Precision@k      |                  |                  |
|                   | k=4              | k=8              | k=16             | k=4              | k=8              | k=16             | k=4              | k=8              | k=16             |
| GeM-1 (GAP)       | 0.10             | 0.10             | 0.10             | 0.14             | 0.14             | 0.14             | 0.29             | 0.25             | 0.22             |
| GeM-2             | 0.29             | 0.29             | 0.29             | 0.30             | 0.28             | 0.25             | 0.38             | 0.31             | 0.27             |
| GeM-4             | 0.39             | 0.39             | 0.38             | 0.34             | 0.31             | 0.28             | 0.09             | 0.09             | 0.09             |
| Cov               | 0.25             | 0.25             | 0.25             | 0.45             | 0.43             | 0.41             | 0.35             | 0.30             | 0.26             |
| FSPool            | 0.75±0.00        | 0.74±0.00        | 0.72±0.00        | 0.51±0.00        | 0.48±0.00        | 0.44±0.00        | 0.43±0.03        | 0.36±0.02        | 0.36±0.01        |
| WE                | <b>0.89±0.00</b> | <b>0.88±0.00</b> | <b>0.86±0.00</b> | <b>0.71±0.00</b> | <b>0.68±0.00</b> | <b>0.64±0.00</b> | <b>0.54±0.04</b> | <b>0.47±0.02</b> | <b>0.39±0.02</b> |
| SLOSH ( $L = d$ ) | 0.78±0.08        | 0.76±0.08        | 0.74±0.08        | 0.40±0.01        | 0.38±0.00        | 0.35±0.00        | 0.43±0.03        | 0.36±0.03        | 0.30±0.03        |
| SLOSH ( $L > d$ ) | <b>0.89±0.01</b> | <b>0.88±0.01</b> | <b>0.86±0.01</b> | <b>0.63±0.00</b> | <b>0.59±0.00</b> | <b>0.55±0.00</b> | <b>0.52±0.02</b> | <b>0.45±0.01</b> | <b>0.37±0.01</b> |

Table 2. Retrieval results of baselines and our approach on set retrieval on the three data sets (accuracy).

|                   | Point MNIST 2D   |                  |                  | ModelNet 40      |                  |                  | Oxford 5k        |                  |                  |
|-------------------|------------------|------------------|------------------|------------------|------------------|------------------|------------------|------------------|------------------|
|                   | Accuracy         |                  |                  | Accuracy         |                  |                  | Accuracy         |                  |                  |
|                   | k=4              | k=8              | k=16             | k=4              | k=8              | k=16             | k=4              | k=8              | k=16             |
| GeM-1 (GAP)       | 0.11             | 0.10             | 0.10             | 0.17             | 0.19             | 0.21             | 0.35             | 0.31             | 0.29             |
| GeM-2             | 0.32             | 0.35             | 0.37             | 0.34             | 0.36             | 0.37             | 0.53             | 0.40             | 0.38             |
| GeM-4             | 0.45             | 0.47             | 0.49             | 0.39             | 0.39             | 0.39             | 0.09             | 0.09             | 0.09             |
| Cov               | 0.26             | 0.28             | 0.28             | 0.51             | 0.52             | 0.52             | 0.55             | 0.37             | 0.33             |
| FSPool            | 0.80±0.00        | 0.81±0.01        | 0.81±0.01        | 0.58±0.00        | 0.58±0.01        | 0.58±0.01        | 0.50±0.04        | 0.53±0.06        | 0.44±0.05        |
| WE                | <b>0.92±0.00</b> | <b>0.92±0.00</b> | <b>0.92±0.00</b> | <b>0.76±0.01</b> | <b>0.76±0.00</b> | <b>0.75±0.01</b> | <b>0.70±0.08</b> | <b>0.68±0.04</b> | <b>0.61±0.05</b> |
| SLOSH ( $L = d$ ) | 0.82±0.06        | 0.83±0.06        | 0.82±0.06        | 0.46±0.01        | 0.47±0.01        | 0.46±0.00        | 0.54±0.04        | 0.53±0.07        | 0.45±0.07        |
| SLOSH ( $L > d$ ) | <b>0.92±0.01</b> | <b>0.92±0.01</b> | <b>0.92±0.01</b> | <b>0.68±0.01</b> | <b>0.67±0.00</b> | <b>0.65±0.00</b> | <b>0.69±0.03</b> | <b>0.67±0.03</b> | <b>0.61±0.03</b> |
